# Supplementary material
Source: MDPI journal article supplement (https://www.mdpi.com/2304-6740/11/5/212)
Supplement: s1 [file s1]

# The Role of Non-Covalent Interactions in the Reactions between Palladium Hydrido Complex with Amidoarylphosphine Pincer Ligand and Brønsted Acids

Vladislava A. Kirkina <sup>1</sup>, Vasilisa A. Kulikova <sup>1</sup>, Evgenii I. Gutsul <sup>1</sup>, Zufar N. Gafurov <sup>2</sup>, Ilias F. Sakhapov <sup>2</sup>, Dmitry G. Yakhvarov <sup>2,3</sup>, Yulia V. Nelyubina <sup>1</sup>, Oleg A. Filippov <sup>1</sup>, Elena S. Shubina <sup>1,\*</sup> and Natalia V. Belkova <sup>1,\*</sup>

- 1 A.N. Nesmeyanov Institute of Organoelement Compounds, Russian Academy of Sciences (INEOS RAS), 28, Vavilov Str., 119334 Moscow, Russia; vladislava.kirkina@gmail.com (V.A.K.); kullisa99@gmail.com (V.A.K.); evgenii@ineos.ac.ru (E.I.G.); unelya@ineos.ac.ru (Y.V.N.); h-bond@ineos.ac.ru (O.A.F.)
  - 2 A.E. Arbuzov Institute of Organic and Physical Chemistry, FRC Kazan Scientific Center, Russian Academy of Sciences, Arbuzov Str. 8, 420088 Kazan, Russia; gafurov.zufar@iopc.ru (Z.N.G.); ilyas.sakhapov@iopc.ru (I.F.S.); yakhvar@iopc.ru (D.G.Y.)
  - 3 A. Butlerov Institute of Chemistry, Kazan Federal University, Kremlyovskaya Str. 18, 420008 Kazan, Russia
- \* Correspondence: shu@ineos.ac.ru (E.S.S.); nataliabelk@ineos.ac.ru (N.V.B.)

## Supplementary Materials

**Table S1.** Key spectral parameters of (PNP)PdH (**1**) in toluene-*d*<sub>8</sub>

|          | T, K | $\nu_{\text{PdH}}$ , cm <sup>-1</sup> |      | $\delta_{\text{PdH}}$ , ppm |        | $\delta_{\text{P}}$ , ppm |      |
|----------|------|---------------------------------------|------|-----------------------------|--------|---------------------------|------|
|          |      | 295                                   | 190  | 295                         | 190    | 295                       | 190  |
| (PNP)PdH |      | 1923                                  | 1928 | -10.42                      | -10.18 | 59.1                      | 58.3 |

**Table S2.** Key spectral parameters of palladium complexes formed by the interaction of **1** with acids. Toluene-*d*<sub>8</sub>, 295 K.

| Acids (AH)                                  |                                       | FA                  | TfOH                | H[BF <sub>4</sub> ] | PFTB               | HFIP                 | TFE                |
|---------------------------------------------|---------------------------------------|---------------------|---------------------|---------------------|--------------------|----------------------|--------------------|
|                                             | $pK_a(\text{MeCN})$                   | 20.9                | 0.7                 |                     | 20.5               |                      |                    |
|                                             | $pK_a(\text{DMSO})$                   |                     |                     |                     | 10.7               | 17.9                 | 23.5               |
|                                             | $pK_a(\text{DMF})$                    | 18.9 [1]            |                     | 3.4 [2]             |                    |                      |                    |
| (PNP)PdH...HA                               | $\nu_{\text{PdH}}$ , cm <sup>-1</sup> | 1917                |                     |                     |                    | 1926 <sup>#</sup>    | 1924 <sup>#</sup>  |
|                                             | $\delta_{\text{PdH}}$ , ppm           | -10.43              |                     |                     |                    | -10.46 <sup>#</sup>  | -10.66             |
|                                             |                                       | -10.26 <sup>#</sup> | –                   | –                   | –                  |                      |                    |
|                                             | $\delta_{\text{P}}$ , ppm             | 59.0                |                     |                     |                    | 58.0 <sup>#</sup>    | 58.9               |
|                                             |                                       | 57.9 <sup>#</sup>   |                     |                     |                    |                      |                    |
| [(PN(H)P)PdH] <sup>+</sup> [A] <sup>-</sup> | $\nu_{\text{PdH}}$ , cm <sup>-1</sup> | 1994                | 1991 <sup>*</sup>   | 1992 <sup>*</sup>   | 1994 <sup>#</sup>  | 1998 <sup>#</sup>    |                    |
|                                             | $\nu_{\text{NH}}$ , cm <sup>-1</sup>  |                     | 2811 <sup>*</sup>   | &                   | 2806 <sup>#</sup>  | &                    |                    |
|                                             | $\delta_{\text{PdH}}$ , ppm           | -11.95 <sup>#</sup> | -12.04 <sup>*</sup> | -12.12              | &                  | -12.33 <sup>#</sup>  | –                  |
|                                             | $\delta_{\text{NH}}$ , ppm            | 10.75 <sup>#</sup>  | 10.41 <sup>*</sup>  | 9.53                | &                  | &                    |                    |
|                                             | $\delta_{\text{P}}$ , ppm             | 55.9 <sup>#</sup>   | 56.7 <sup>*</sup>   | 56.9                | &                  | 54.3 <sup>#</sup>    |                    |
| [(PN(H)P)PdH] <sup>+</sup> ·AH              | $\nu_{\text{PdH}}$ , cm <sup>-1</sup> |                     |                     |                     | 2013 <sup>**</sup> | 2015 <sup>**</sup>   | 2009 <sup>**</sup> |
|                                             | $\delta_{\text{PdH}}$ , ppm           | –                   | –                   | –                   | &                  | -12.26 <sup>**</sup> | &                  |
|                                             | $\delta_{\text{NH}}$ , ppm            |                     |                     |                     | &                  | 7.07 <sup>**</sup>   | &                  |
|                                             | $\delta_{\text{P}}$ , ppm             |                     |                     |                     | &                  | 55.8 <sup>**</sup>   | &                  |
| (PNP)Pd-A                                   | $\delta_{\text{P}}$ , ppm             |                     | 53.1 <sup>*</sup>   | –                   | –                  | –                    | –                  |

<sup>\*</sup> in benzene-*d*<sub>6</sub>; <sup>\*\*</sup> in neat alcohol; <sup>#</sup> at 190 K; & no data; – complex hasn't been detected.

1. Brian G. Cox. Acids and bases. Solvent effects on acid–base strength. OUP Oxford 2013
2. V. Fourmond, P. A. Jacques, M. Fontecave, V. Artero, *Inorg. Chem.* **2010**, 49, 10338–10347

**Table S3.** DFT calculated frequencies of PdH stretching vibrations and formation energies <sup>a</sup> of **1** and its bimolecular complexes with TFE in toluene.

|                                             | <b>1</b> | MH...HO | N...HO |
|---------------------------------------------|----------|---------|--------|
| $\nu_{\text{PdH}}$ , cm <sup>-1</sup>       | 2064     | 2030    | 2083   |
| $A_{\text{PdH}}$ , km·mol <sup>-1</sup>     | 401      | 382     | 377    |
| $\Delta\nu_{\text{PdH}}$ , cm <sup>-1</sup> |          | -34     | +18    |
| $\Delta E$ , kcal·mol <sup>-1</sup>         |          | -9.5    | -9.0   |
| $\Delta G$ , kcal·mol <sup>-1</sup>         |          | +2.5    | +5.7   |

<sup>a</sup> Relative to isolated reactants.

**Table S4.** DFT calculated frequencies of PdH stretching vibrations and formation energies <sup>a</sup> of **2** and its non-covalent adducts with pyridine and TFE.

|                                                 | <b>2</b> | NH...Py | MH...HO | NH...O | <b>2</b> ·2TFE |
|-------------------------------------------------|----------|---------|---------|--------|----------------|
| $\nu_{\text{PdH}}, \text{cm}^{-1}$              | 2099     | 2108    | 2135    | 2108   | 2113           |
| $A_{\text{PdH}}, \text{km}\cdot\text{mol}^{-1}$ | 210      | 221     | 185     | 221    | 186            |
| $\Delta\nu_{\text{PdH}}, \text{cm}^{-1}$        |          | 9       | 36      | 9      | 14             |
| $\Delta E, \text{kcal}\cdot\text{mol}^{-1}$     |          | -12.0   | -7.2    | -6.9   | -18.5          |
| $\Delta G, \text{kcal}\cdot\text{mol}^{-1}$     |          | +0.4    | +5.0    | +4.0   | +7.8           |

<sup>a</sup> Relative to isolated reactants.

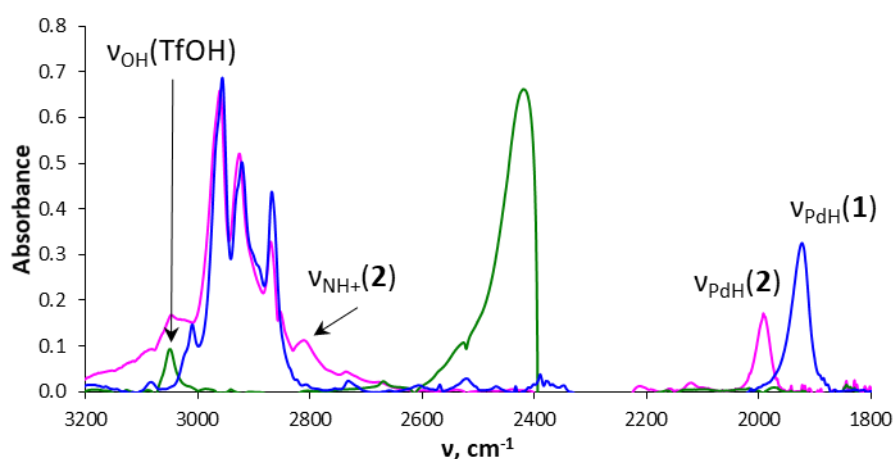

**Figure S1.** IR spectra of (PNP)PdH ( $c = 0.02$  M) (blue), TfOH ( $c = 0.022$  M) (green) and their 1:1.1 equiv. mixture (purple) in toluene- $d_8$  at 295 K,  $l = 0.1$  cm.

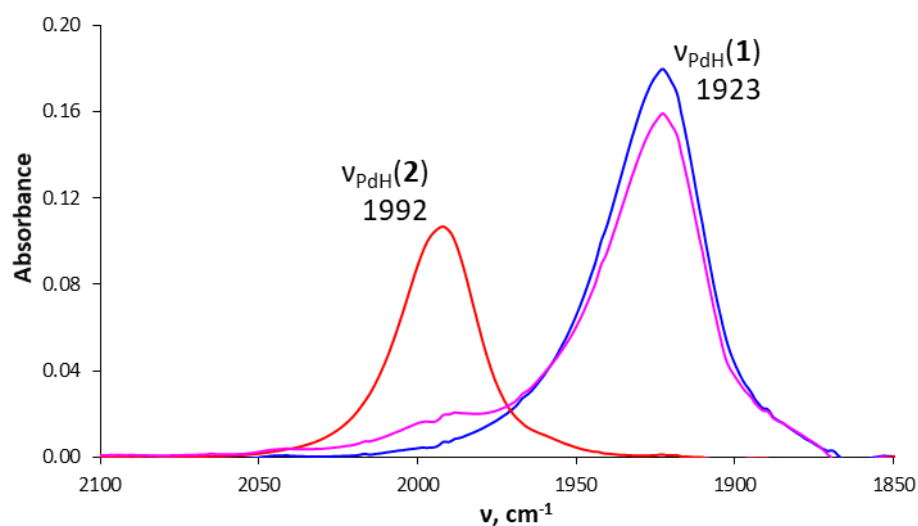

**Figure S2.** IR spectra of (PNP)PdH ( $c = 0.02$  M) (blue), with 1 equivalent of  $\text{H}[\text{BF}_4]\cdot\text{Et}_2\text{O}$  ( $c = 0.02$  M) (red) and their 1:1:1 equiv. mixture with pyridine (purple, residual  $\nu_{\text{PdH}}^{\text{NH}^+}$  at 1992  $\text{cm}^{-1}$  is because of inaccuracy of addition) in benzene- $d_6$  at 295 K,  $l = 0.1$  cm.

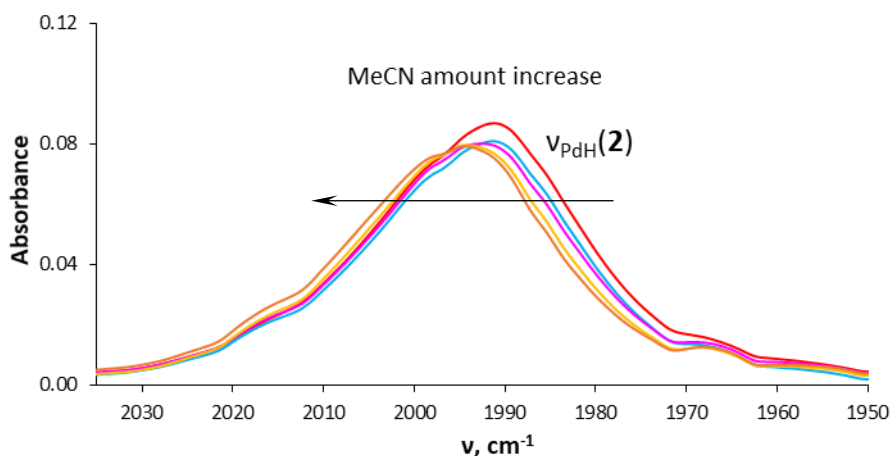

**Figure S3.** IR spectra of  $\nu_{\text{PdH}}$  stretching vibrations region of  $[(\text{PN}(\text{H})\text{P})\text{PdH}]^+[\text{BF}_4]^-$  ( $c = 0.02 \text{ M}$ ) (red), with 5 (sky blue), 20 (purple), 50 (yellow) and 100 (orange) equiv. MeCN in benzene- $d_6$ , 295 K,  $l = 0.1 \text{ cm}$ .

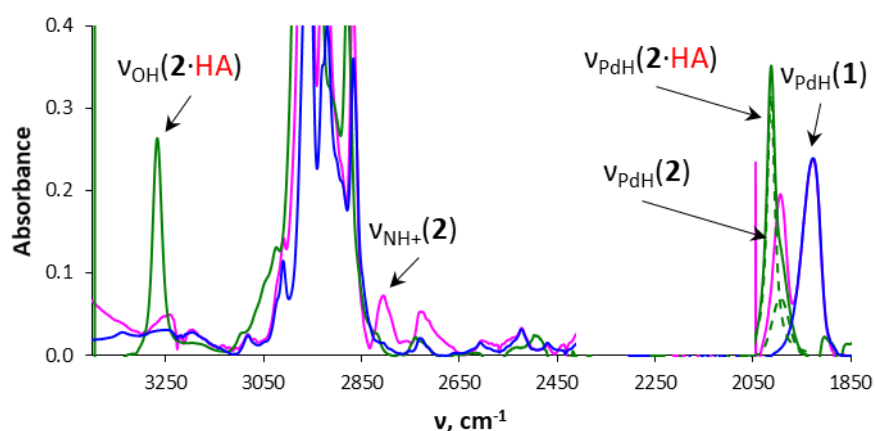

**Figure S4.** IR spectra in the PdH stretching vibrations region of (PNP)PdH at 190 K ( $c = 0.032 \text{ M}$  in toluene- $d_8$ ; blue, normalized intensity\*), with 5 equiv. PFTB in toluene- $d_8$  at 190 K (purple) and in neat PFTB at 295 K ( $c = 0.032 \text{ M}$ ; green). Green dashed lines show the result of the band deconvolution.

\* - Intensity of initial  $\nu_{\text{PdH}}(1)$  was normalized by multiplication to make it coincide with the intensity in the maximum point ( $1928 \text{ cm}^{-1}$ ) of  $\nu_{\text{PdH}}$  observed in 1/PFTB mixture.

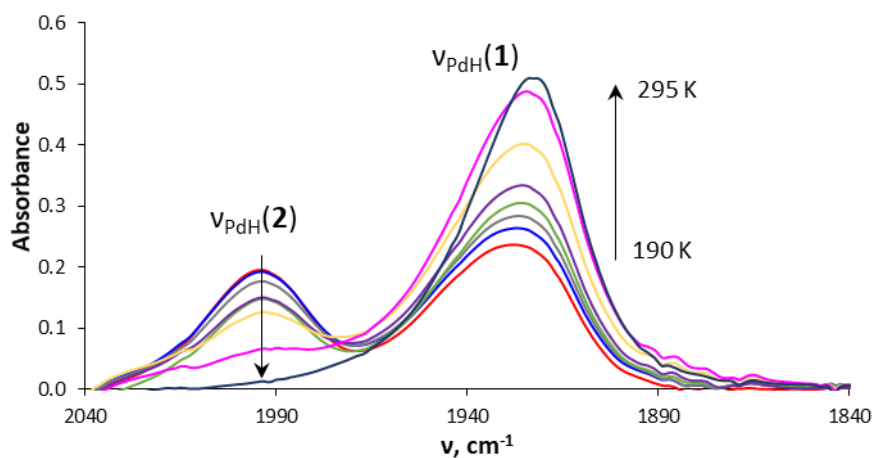

**Figure S5.** IR spectra of  $\nu_{\text{CO}}$  stretching vibrations region of (PNP)PdH ( $c = 0.032 \text{ M}$ ) with 5 equiv. PFTB ( $c = 0.16 \text{ M}$ ) in toluene- $d_8$  at 190-295 K,  $l = 0.1 \text{ cm}$ .

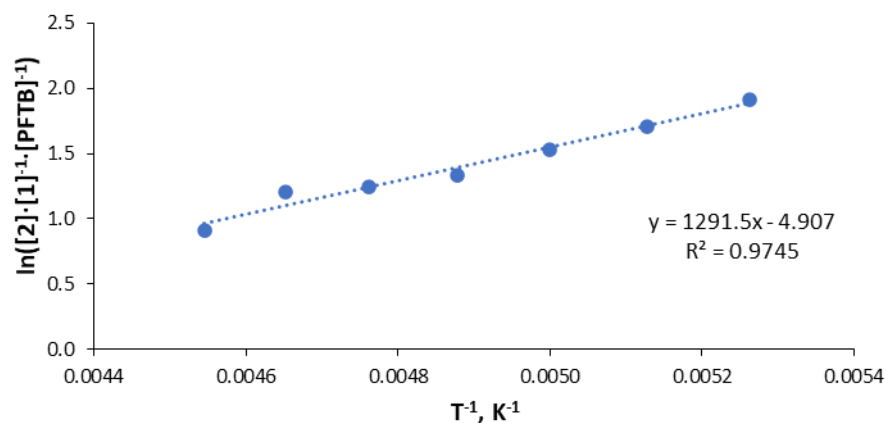

**Figure S6.** The temperature dependence of equilibrium constant for  $1 + \text{PFTB} \leftrightarrow 2[\text{OC}(\text{CF}_3)_3]$  in toluene- $d_8$ .

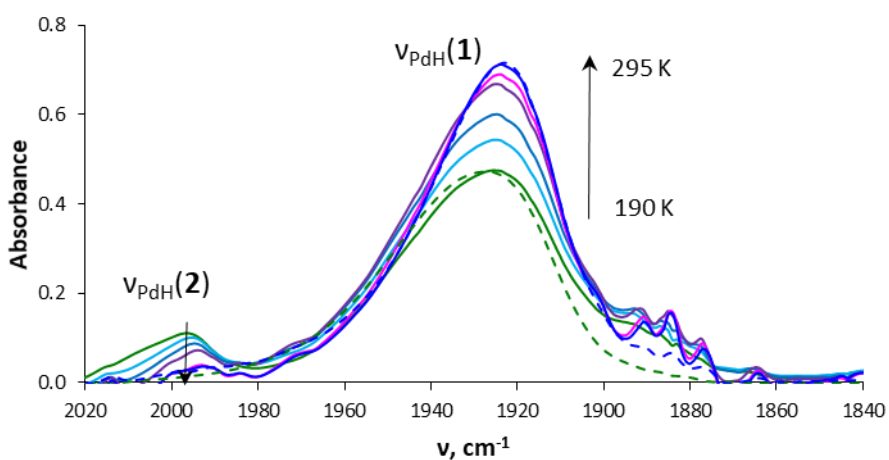

**Figure S7.** IR spectra of  $\nu_{\text{PdH}}$  stretching vibrations region of (PNP)PdH ( $c = 0.0262 \text{ M}$ ) (dashed) and with 4 equiv. HFIP ( $c = 0.105 \text{ M}$ ) in toluene- $d_8$  at 190-295 K,  $l = 0.2 \text{ cm}$ .

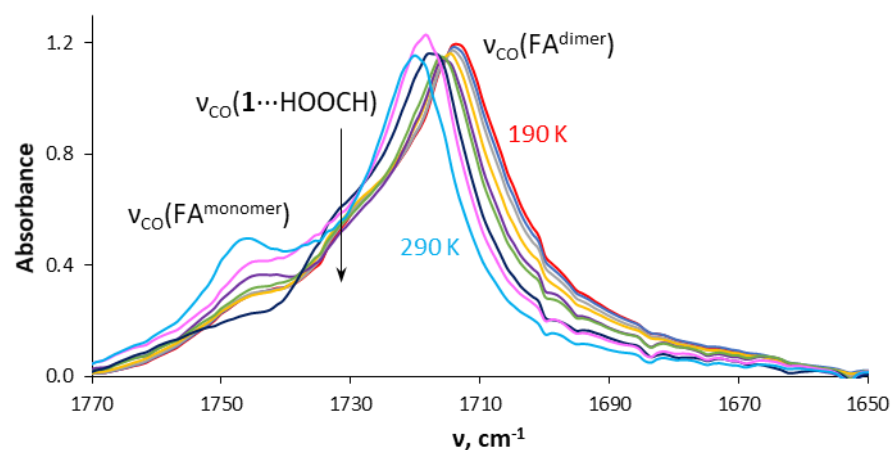

**Figure S8.** IR spectra of  $\nu_{\text{CO}}$  stretching vibrations region of HCOOH ( $c = 0.12 \text{ M}$ ) with 0.5 equiv. (PNP)PdH ( $c = 0.06 \text{ M}$ ) in toluene at 190 - 290 K,  $l = 0.05 \text{ cm}$ .

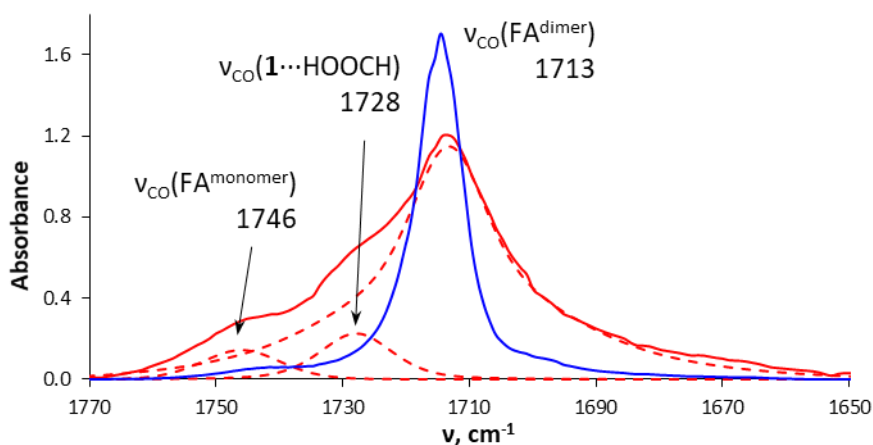

**Figure S9.** IR spectra of  $\nu_{\text{CO}}$  stretching vibrations region of HCOOH ( $c = 0.12$  M) (blue) and with 0.5 equiv. (PNP)PdH ( $c = 0.06$  M) in toluene at 190 K (red, dashed lines are the result of band deconvolution),  $l = 0.05$  cm.

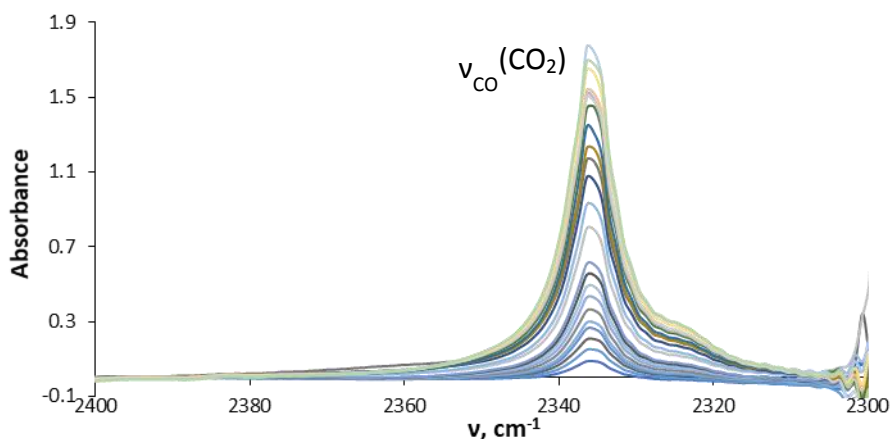

**Figure S10.** IR spectra of  $\nu_{\text{CO}}$  stretching vibrations region of  $\text{CO}_2$  evolved from HCOOH ( $c = 0.04$  M) with 0.5 equiv. (PNP)PdH ( $c = 0.02$  M) in toluene- $d_8$  at 295 K,  $t = 80\text{-}10000$  s,  $l = 0.1$  cm.

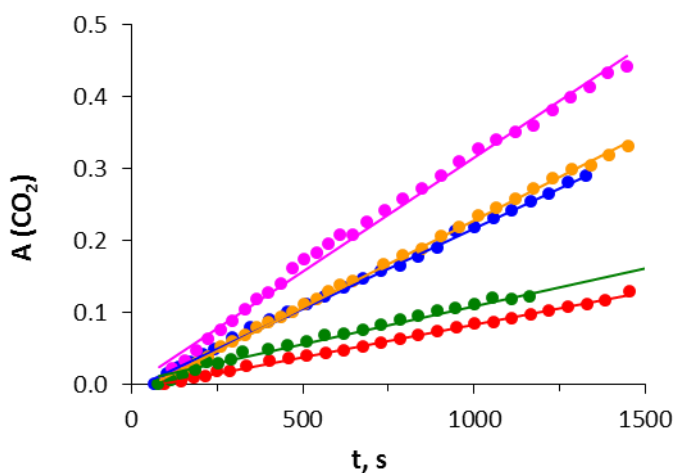

**Figure S11.** Kinetics of  $\text{CO}_2$  evolution from formic acid, monitored by change of  $\nu_{\text{CO}_2}$  band intensity for the mixture of (PNP)PdH ( $c = 0.02$  M) with 0.5 (blue), 1 (orange), 2 (purple), 5 (red) and 10 (green) equiv. HCOOH. 295 K, toluene- $d_8$ .

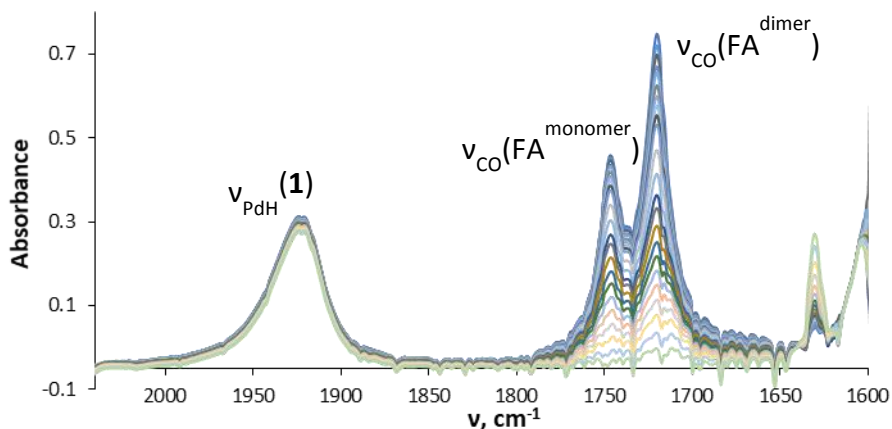

**Figure S12.** IR spectra of  $\nu_{\text{PdH}}$  of (PNP)PdH ( $c = 0.02$  M) and  $\nu_{\text{CO}}$  of HCOOH ( $c = 0.04$  M) stretching vibrations regions in toluene- $d_8$  at 295 K,  $t = 80$ -10000 s,  $l = 0.1$  cm.

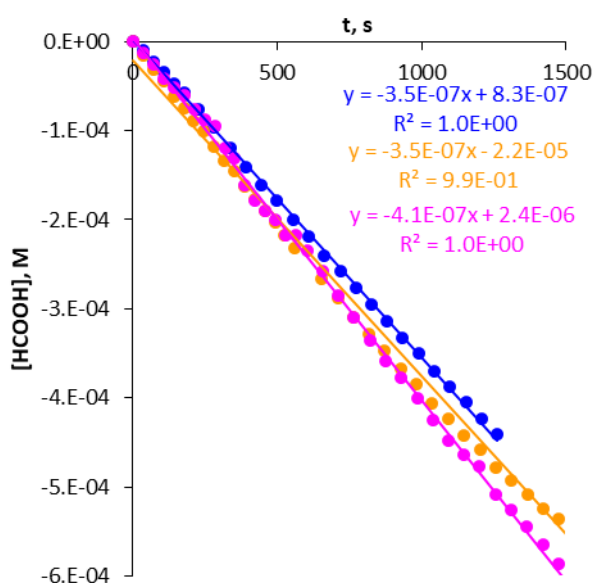

**Figure S13.** Kinetics of formic acid decomposition monitored by change of  $\nu_{\text{CO}}(\text{FA}^{\text{monomer}})$  band intensity for the mixture of (PNP)PdH ( $c = 0.02$  M) with 0.5 (blue), 1 (orange) and 2 (purple) equiv. HCOOH. 295 K, toluene- $d_8$ .

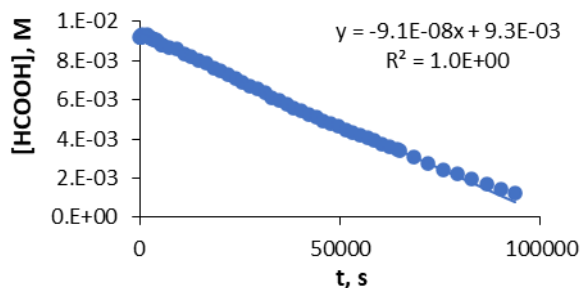

**Figure S14.** Kinetics of formic acid decomposition, monitored by change of  $\nu_{\text{CO}}(\text{FA}^{\text{monomer}})$  band intensity for the mixture of (PNP)PdH ( $c = 0.02$  M) with 5 equiv. HCOOH. 295 K, toluene- $d_8$ .

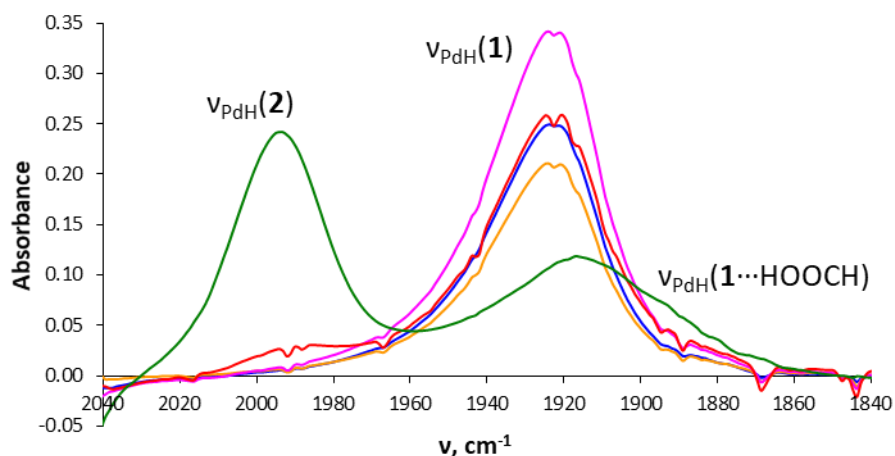

**Figure S15.** IR spectra in the  $\nu_{\text{PdH}}$  stretching vibrations region of (PNP)PdH ( $c(\mathbf{1}) = 0.02 \text{ M}$ ) in the presence of 0.5 (blue), 1 (orange), 2 (purple), 5 (red) and 10 (green) equiv. HCOOH measured in 150 s after mixing. 295 K, toluene- $d_8$ ,  $l = 0.1 \text{ cm}$ .

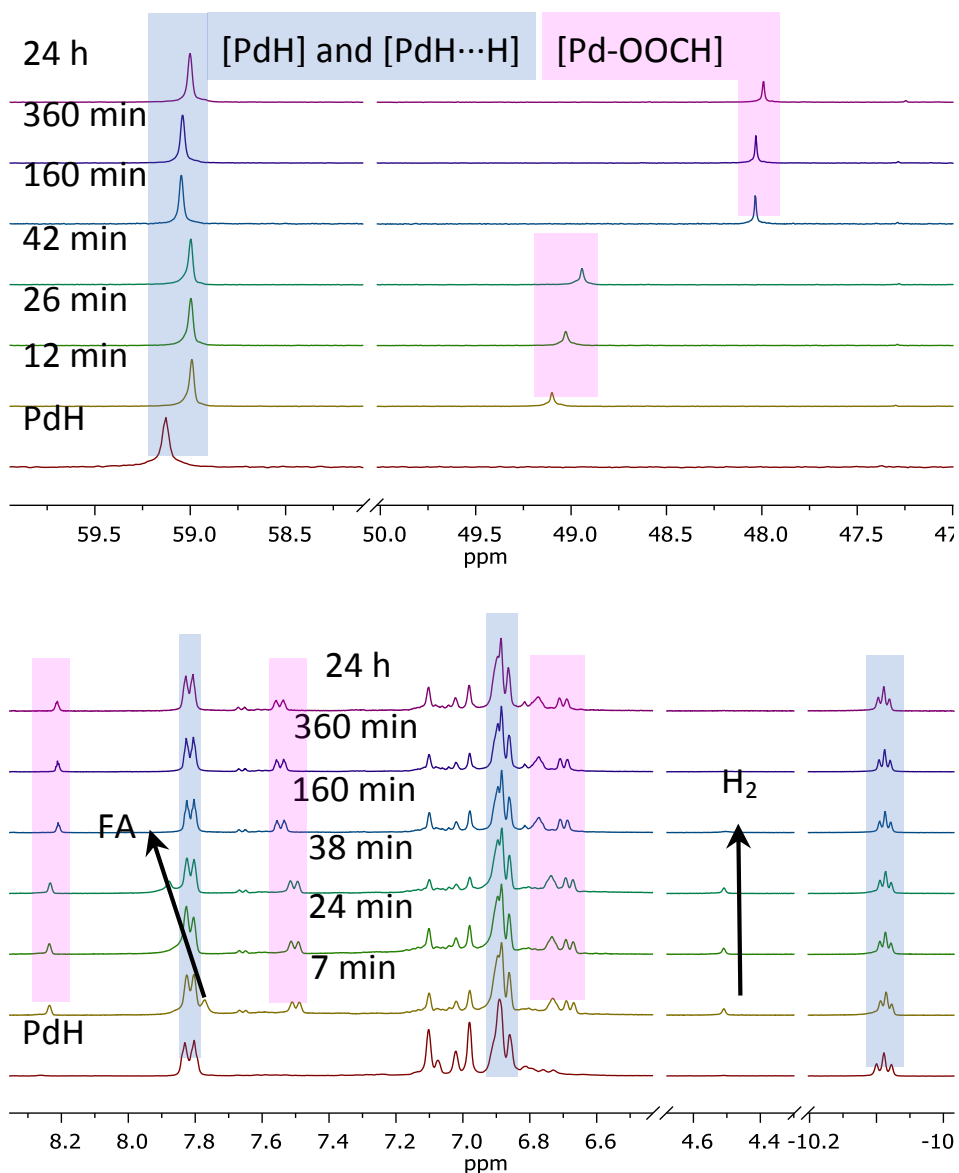

**Figure S16.**  $^{31}\text{P}\{^1\text{H}\}$  (161.94 MHz; at the top) and  $^1\text{H}$  (400.01 MHz; in the bottom) NMR monitoring of (PNP)PdH ( $c = 0.04 \text{ M}$ ) with 2 equiv. HCOOH ( $c = 0.08 \text{ M}$ ) in toluene- $d_8$ , 295 K.



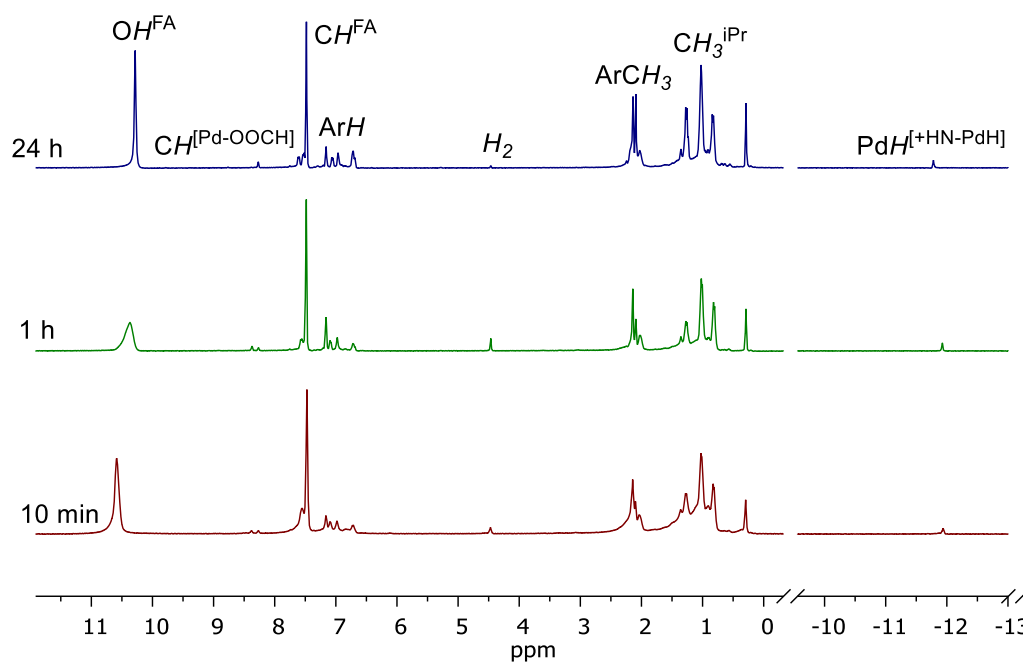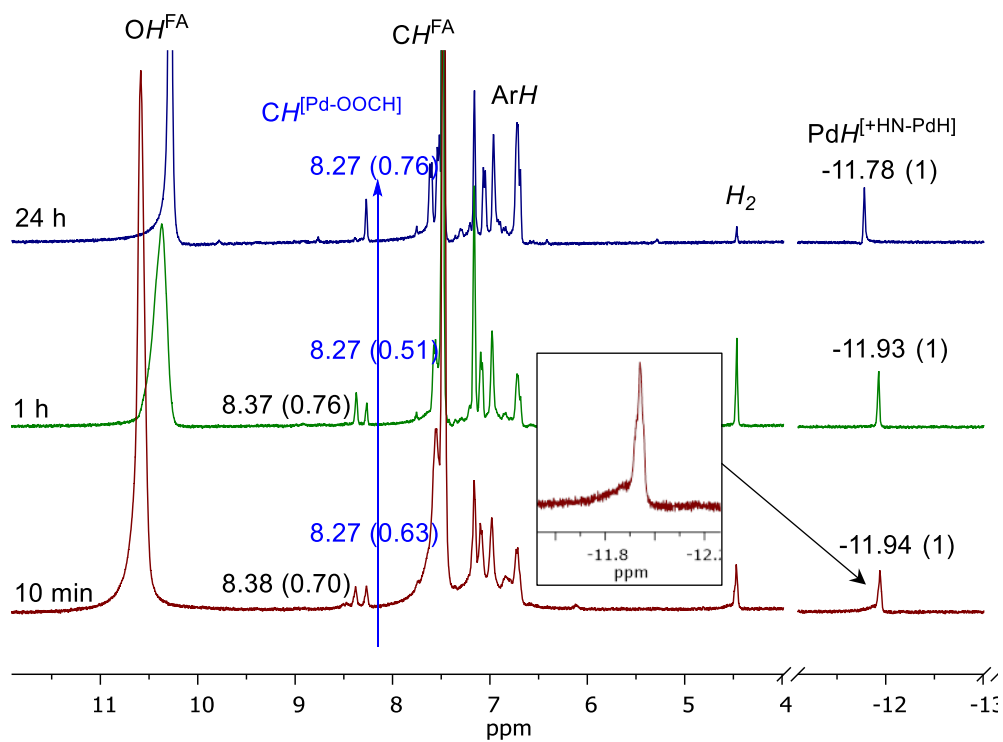

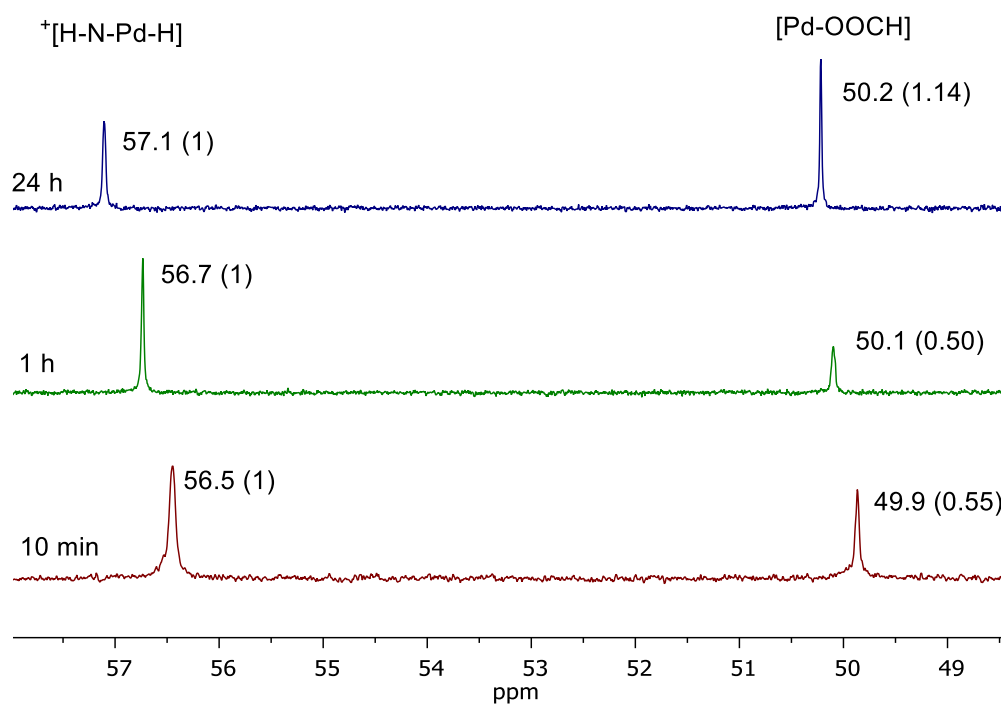

**Figure S17.**  $^{31}\text{P}\{^1\text{H}\}$  (161.94 MHz; at the top) and  $^1\text{H}$  (400.01 MHz; in the bottom) NMR monitoring of (PNP)PdH ( $c = 0.03$  M) with 10 equiv. HCOOH ( $c = 0.3$  M) in benzene- $d_6$ , 295 K.
